# Supplementary material for: Keratinocytes costimulate naive human T cells via CD2: a potential target to prevent the development of proinflammatory Th1 cells in the skin
Source: PubMed Central journal article supplement (PMC7109061; doi:10.1038/s41423-019-0261-x), 2019-07-19

Figure S1

**A**

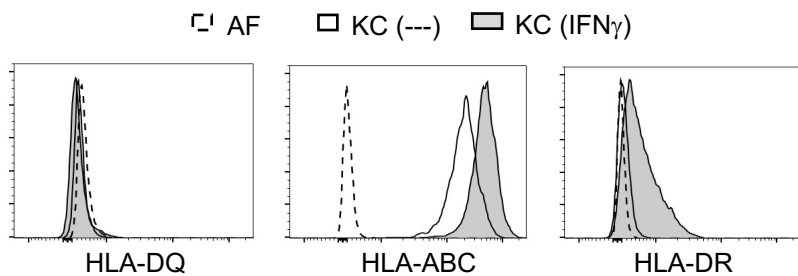

**B**

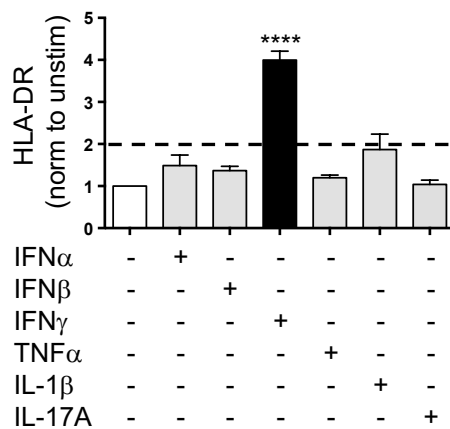

**C**

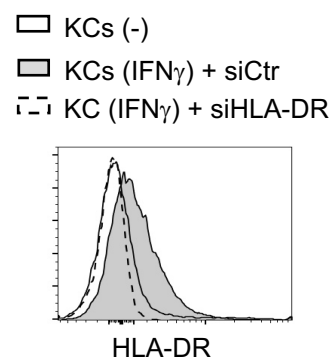

**D**

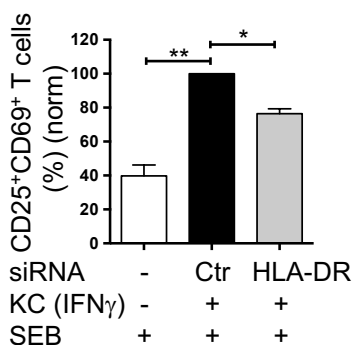

**E**

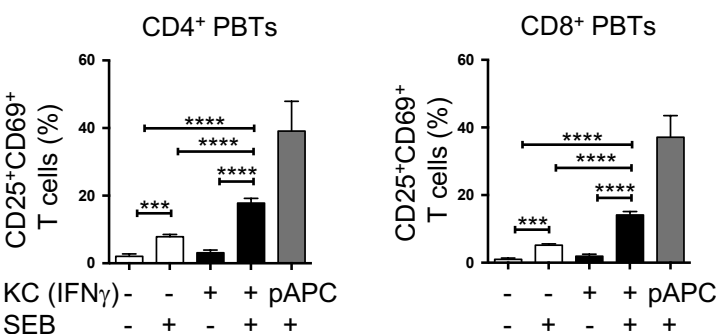

**F**

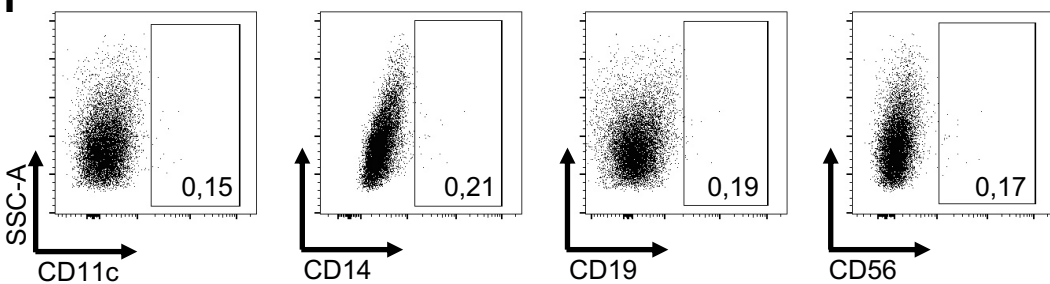

**G**

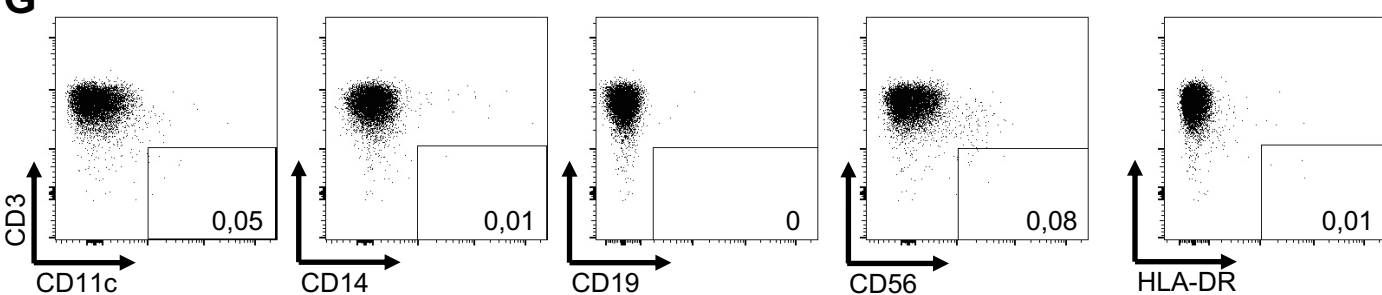

Figure S2

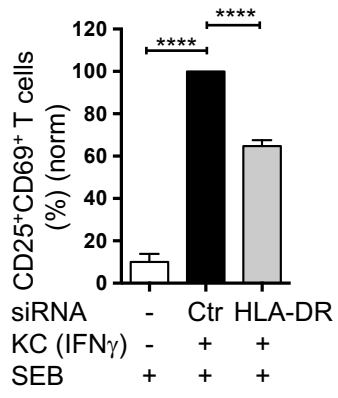

Figure S3

**A**

IFN $\gamma$ -pretreated keratinocytes + naïve T cells

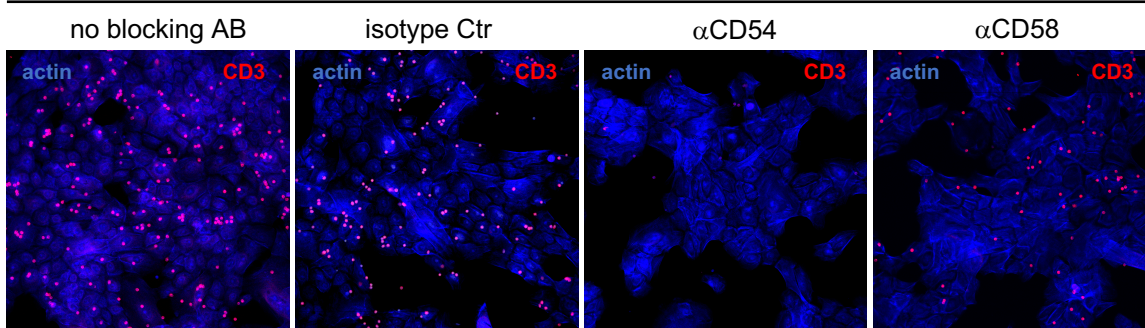

**B**

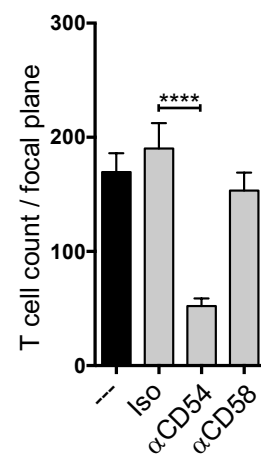

**C**

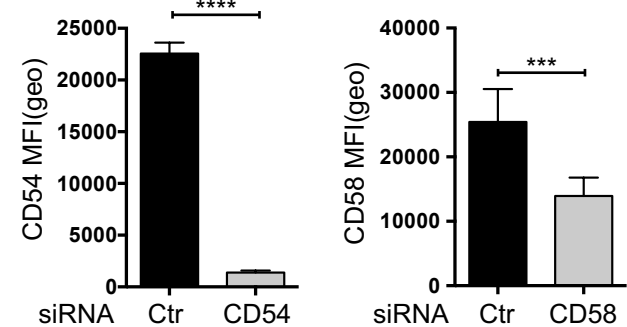

**D**

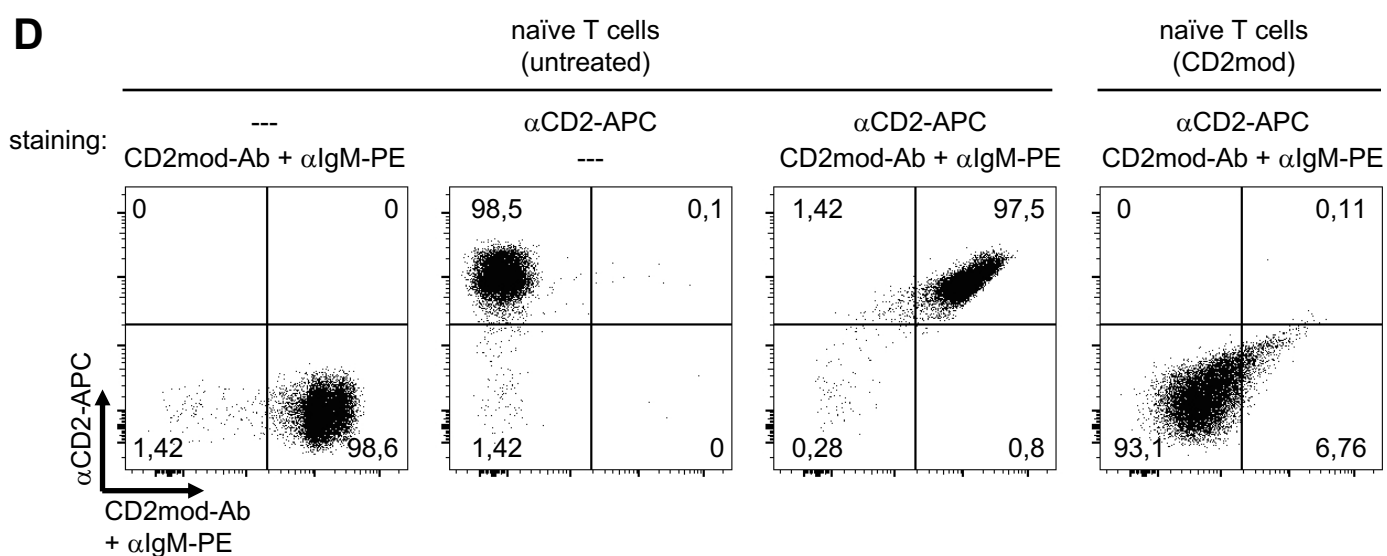

**E**

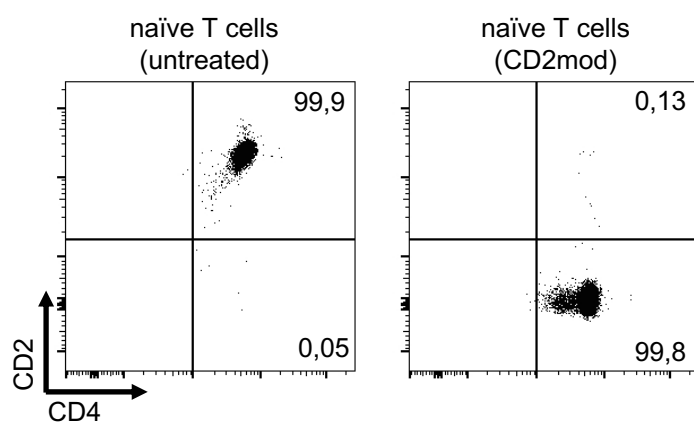

Figure S4

**A**

|              | KC (-)<br>-SEB | KC (-)<br>+SEB | KC (IFN $\gamma$ )<br>+SEB | pAPC<br>+SEB  |
|--------------|----------------|----------------|----------------------------|---------------|
| IL-5         | n.d.           | n.d.           | n.d.                       | n.d.          |
| IL-13        | <100 pg/mL     | <100 pg/mL     | <100 pg/mL                 | <100 pg/mL    |
| IL-2         | <100 pg/mL     | 533,8 pg/mL    | 3149 pg/mL                 | 8473 pg/mL    |
| IL-6         | 367,2 pg/mL    | 908,4 pg/mL    | 900,2 pg/mL                | <100 pg/mL    |
| IL-9         | <100 pg/mL     | <100 pg/mL     | <100 pg/mL                 | <100 pg/mL    |
| IL-10        | <100 pg/mL     | <100 pg/mL     | 141,5 pg/mL                | 175,5 pg/mL   |
| IFN $\gamma$ | <100 pg/mL     | 4572,6 pg/mL   | 15389 pg/mL                | 15389 pg/mL   |
| TNF $\alpha$ | <100 pg/mL     | 11,6 pg/mL     | 155,9 pg/mL                | 9512,74 pg/mL |
| IL-17A       | n.d.           | n.d.           | n.d.                       | n.d.          |
| IL-17F       | n.d.           | n.d.           | n.d.                       | n.d.          |
| IL-4         | n.d.           | n.d.           | n.d.                       | n.d.          |
| IL-21        | n.d.           | n.d.           | n.d.                       | n.d.          |
| IL-22        | n.d.           | n.d.           | n.d.                       | n.d.          |

**B**

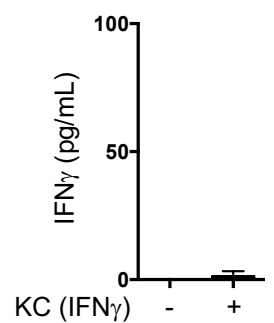

**C**

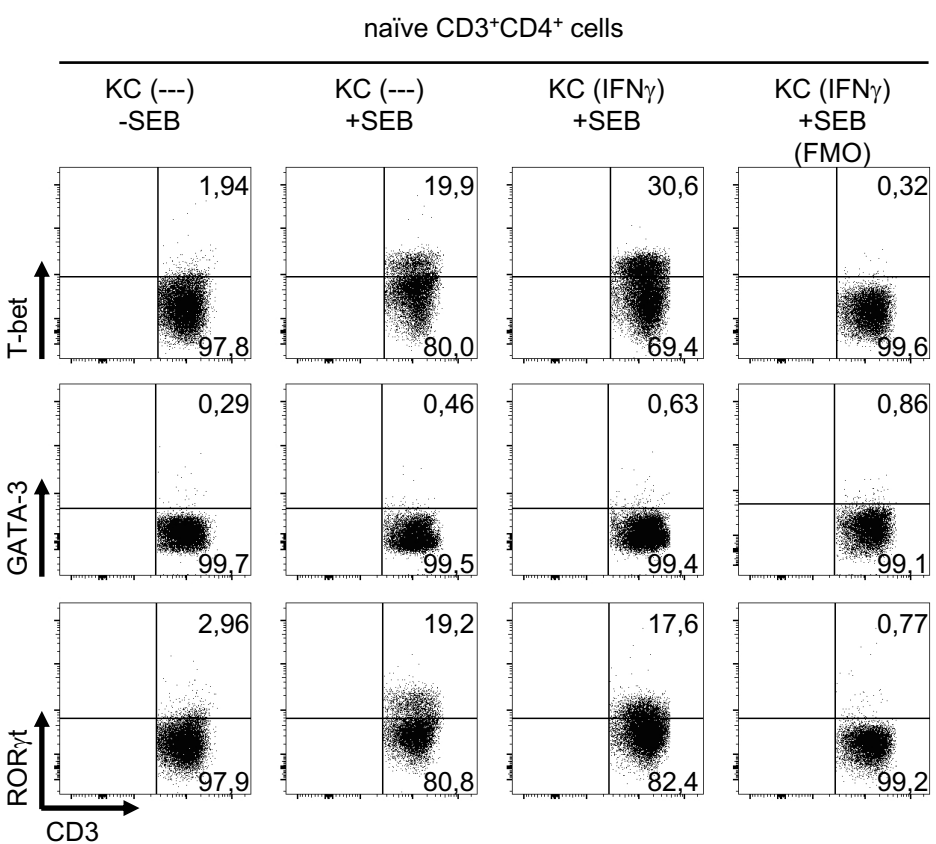

**D**

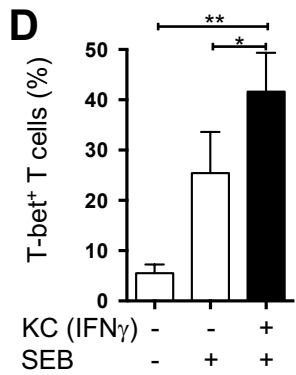

**E**

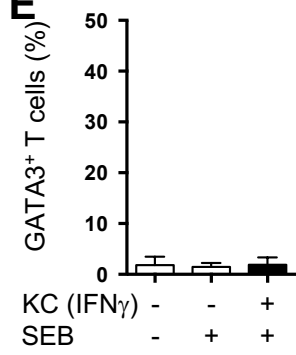

**F**

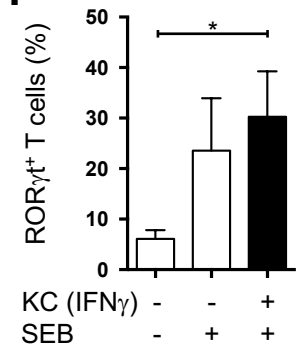

Figure S5

**A**

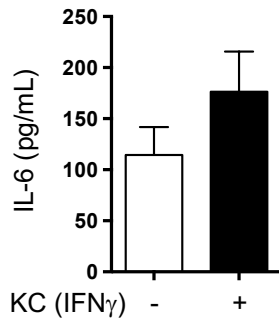

**B**

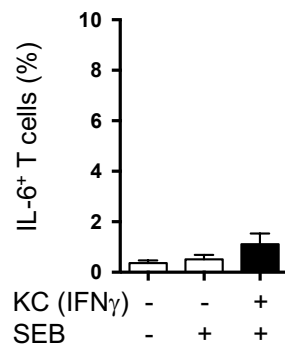

**C**

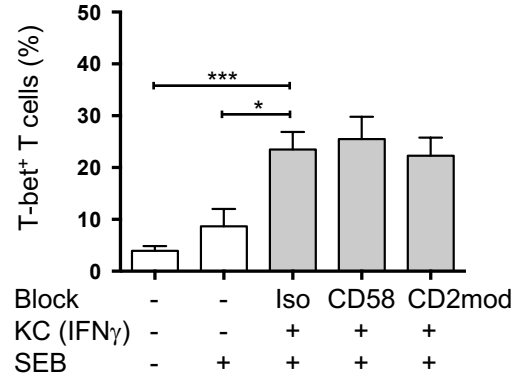

Figure S6

**A**

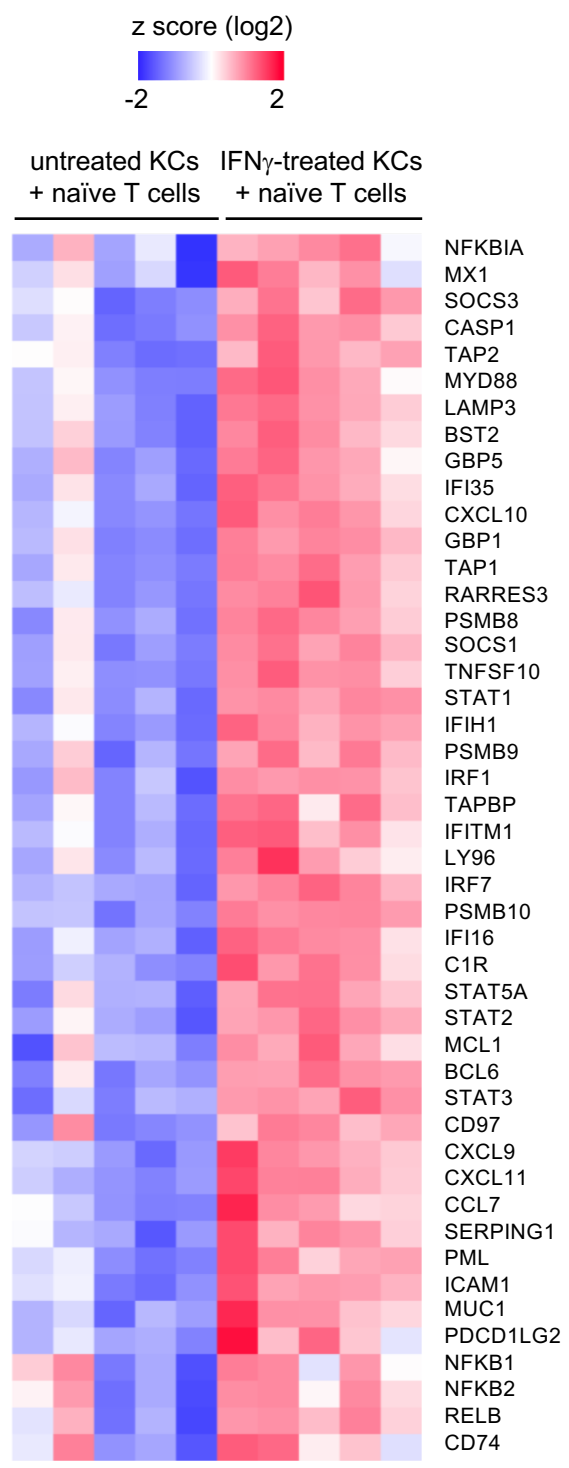

**B**

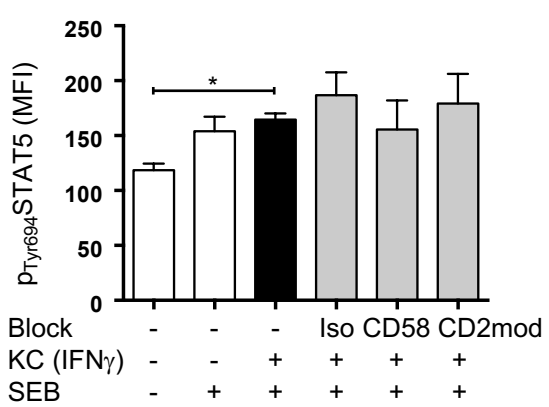

**C**

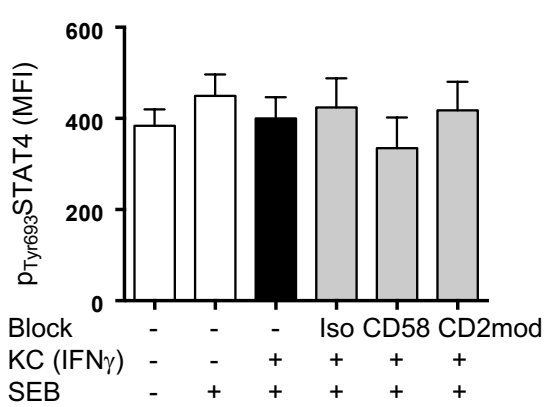

**D**

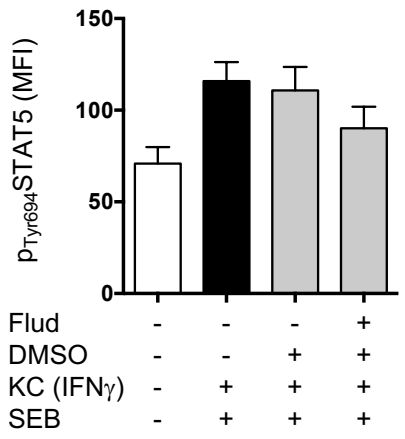

**E**

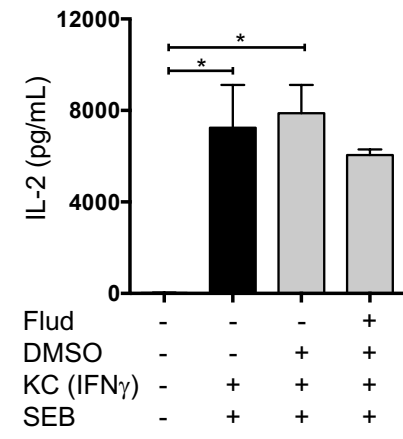

Figure S7

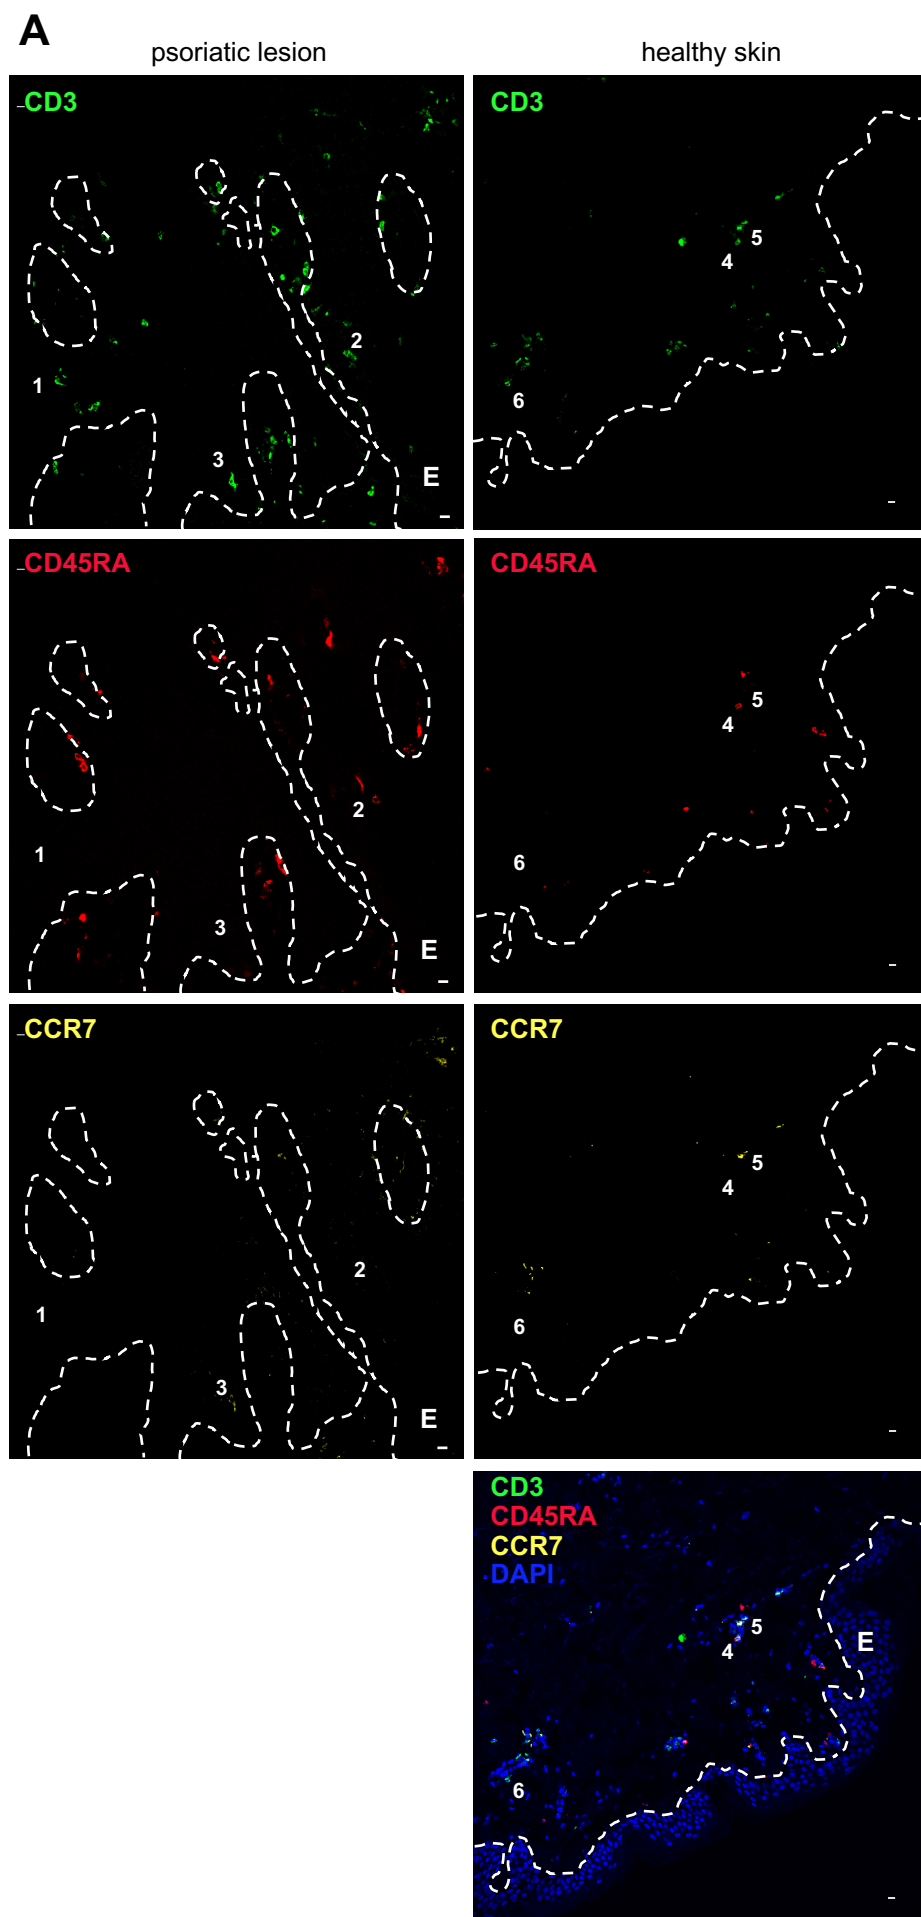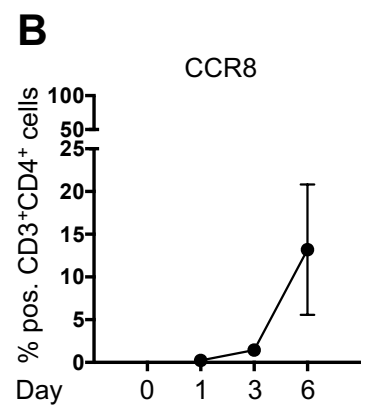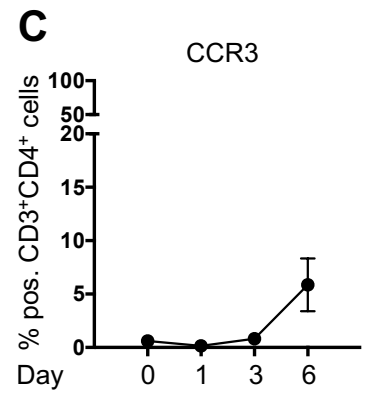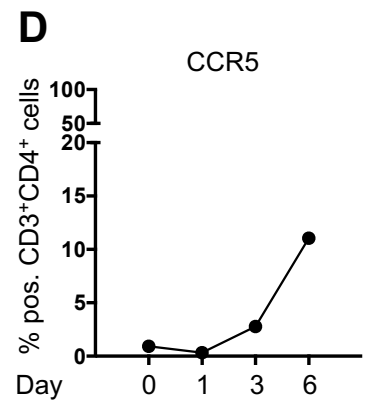

Supplement: 41423_2019_261_MOESM1_ESM.pdf [file 41423_2019_261_MOESM1_ESM.pdf]
