# Supplementary material for: Keratinocytes costimulate naive human T cells via CD2: a potential target to prevent the development of proinflammatory Th1 cells in the skin
Source: PubMed Central journal article supplement (PMC7109061; doi:10.1038/s41423-019-0261-x), 2019-07-19
Supplement: 41423_2019_261_MOESM3_ESM.pdf [file 41423_2019_261_MOESM3_ESM.pdf]

## Supplemental Information

### **Figure S1: siRNA-mediated knock down of HLA-DR in primary human keratinocytes and phenotyping of primary human keratinocytes and PBTs.**

**A-C:** Role of HLA-DR in KC-induced T cell activation. Representative histograms (**A**) of MHC I (HLA-ABC) and MHC II (HLA-DR, HLA-DQ) surface expression on untreated KCs (black line, white background) and IFN $\gamma$ -pretreated KCs (black line, grey background) cultured for 24 h. Autofluorescence (AF; dashed line, white background). Histograms (**B**) of HLA-DR expression on untreated KCs (black line, white background) and IFN $\gamma$ -pretreated KCs incubated with control siRNA (siCtr; black line, grey background) or siRNA against HLA-DR (siHLA-DR; dashed line, white background). CD25 and CD69 expression (**C**) on T cells cultured for 24 h with siRNA-treated KCs.

**D:** Expression of CD25 and CD69 on CD4<sup>+</sup> and CD8<sup>+</sup> T cells cultured for 24 h with untreated KCs (white bars) or IFN $\gamma$ -pretreated KCs (black bars) loaded with (+) or without (-) SEB and then analyzed by flow cytometry. Professional antigen-presenting cells (pAPC) loaded with SEB served as positive control (n = 3 individual T cell donors).

**E-F:** Phenotyping of primary human keratinocytes and primary human PBT preparations. Representative dot plots of surface expression of CD11c, CD14, CD19 and CD56 expression on untreated KC (**E**) and surface expression of CD3, CD11c, CD14, CD19, CD56 and HLA-DR expression on cells of the PBT purification (**F**). Data is represented as mean  $\pm$  SEM. \*\*\*\*=p<0.0001; \*\*\*=p<0.001; \*\*=p<0.01; \*=p<0.05.

### **Figure S2: Effect of HLA-DR knock down on keratinocyte-mediated activation of naïve CD4<sup>+</sup> T cells.**

Effect of siRNA-mediated HLA-DR knock-down in primary human KCs on the expression of CD25 and CD69 on naïve CD4<sup>+</sup> T cells cultured for 24 h with either

untreated KCs (white bars) or IFN $\gamma$ -pretreated KCs (black and grey bars) loaded with SEB (n = 5 individual T cell donors). Expression was analyzed by flow cytometry. Data is represented as mean  $\pm$  SEM. \*\*\*\*= $p < 0.0001$ .

**Figure S3: Effect of blocking antibodies against CD54 and CD58 on T cell adherence to IFN $\gamma$ -pretreated keratinocytes and phenotyping of siRNA-treated keratinocytes and CD2 modulated T cells.**

**A-B:** Naive CD4<sup>+</sup> T cells were cultured for 4 h with untreated KCs (white bars) or IFN $\gamma$ -pretreated KCs (black and grey bars) loaded with SEB in the presence of blocking antibodies (as indicated) and analyzed by confocal microscopy. **A:** Representative immunofluorescence staining for F-actin (blue) and CD3 (red) is shown. **B:** Statistical evaluation of the effect of isotype control antibodies (Iso) or blocking antibodies against costimulatory receptors (CD54, CD58) on the T cell adhesion to IFN $\gamma$ -pretreated KCs (black bar (no antibody) and grey bars) was calculated as number of T cells per optical field (n = 6 individual T cell donors).

**C:** Surface expression of CD54 and CD58 on IFN $\gamma$ -pretreated KCs 24 h after siRNA-treatment (control (siCtr), siCD54 and siCD58) (n  $\geq$  3 independent experiments). **D:** Representative dot plots of surface expression of CD4 and CD2 on untreated and CD2 downmodulated (time point 24 h) naïve CD4<sup>+</sup> T cells (CD2mod). Data is represented as mean  $\pm$  SEM. \*\*\*\*= $p < 0.0001$ ; \*\*\*= $p < 0.001$ .

**Figure S4: Cytokine secretion and expression of transcription factors in keratinocyte-T cell cocultures.**

Naïve CD4<sup>+</sup> T cells were cultured for the indicated time points with untreated KCs or IFN $\gamma$ -pretreated KCs loaded with (+) or without (-) SEB and then analyzed by flow cytometry. **A:** Mean values of the amounts of cytokines secreted into the supernatant

after 24 h coculture (n = 6 individual T cell donors). Professional antigen-presenting cells (pAPCs) loaded with SEB cocultures with T cells served as positive control. Cytokine secretion into the supernatant was analyzed by cytokine bead array. Not detectable cytokines are indicated by 'n.d.'. Cytokines with a concentration below 100 pg/mL were not used for further analysis (<100 pg/mL).

**B-D:** Statistical evaluation of T-bet (**B**) expression, GATA3 (**C**) expression and ROR $\gamma$ t (**D**) expression after 6 days coculture (n = 5 individual T cell donors). Intracellular transcription factor expression was analyzed after PMA/Ionomycin treatment. Data is represented as mean  $\pm$  SEM. \*\*\*\*=p<0.0001; \*\*\*=p<0.001; \*=p<0.05.

**Figure S5: IL-6 production by primary human keratinocytes but not T cells and keratinocyte-mediated T-bet expression.**

**A:** Statistical evaluation of the amount of secreted IL-6 in the supernatant of untreated KCs (white bar) or IFN $\gamma$ -pretreated KCs (black bar) after 24 h (n  $\geq$  3 independent experiments). Cytokine secretion into the supernatant was analyzed by cytokine bead array. **B:** Intracellular IL-6 staining in naïve CD4<sup>+</sup> T cells cultured with untreated KCs (white bars) or IFN $\gamma$ -pretreated KCs (black bars) (n  $\geq$  5 individual T cell donors). **C:** Effect of isotype control (Ctr) and blocking antibodies against CD58 and CD2 downmodulation (CD2mod) on T cells on intracellular T-bet expression in naïve CD4<sup>+</sup> T cells cultured for 6 days with untreated KCs (white bars) or IFN $\gamma$ -pretreated KCs (grey bars) (n = 5 individual T cell donors). Intracellular transcription factor expression was analyzed after PMA/Ionomycin treatment. Data is represented as mean  $\pm$  SEM. \*\*\*=p<0.001; \*=p<0.05.

**Figure S6: mRNA expression profile and STAT4 phosphorylation during keratinocyte-dependent activation of naïve CD4<sup>+</sup> T cells.**

Naïve CD4<sup>+</sup> T cells were cultured for the indicated time points with untreated KCs or IFN $\gamma$ -pretreated KCs loaded with SEB and then analyzed by Nanostring nCounter GEx (mRNA expression) or flow cytometry. **A:** Heat map of regulated genes in naïve CD4<sup>+</sup> T cells in a 4 h coculture (each row of either 'untreated KCs + naïve T cells' or 'IFN $\gamma$ -pretreated + naïve T cells' represents data points derived from T cells from one individual donor). mRNA expression was analyzed by Nanostring nCounter human Immunology Panel.

**B:** Effect of isotype control antibodies (iso), blocking antibodies against CD58, or CD2 downmodulation (CD2mod) on T cells on the phosphorylation of STAT4 after 24 h coculture (n = 5 individual T cell donors). Data is represented as mean  $\pm$  SEM. \*= $p < 0.05$ .

## **Supplemental Experimental Procedures**

### **Gene expression profiling**

The nCounter Nanostring GX Human Immunology V2 panel was used to analyze the expression of 579 immune and inflammation associated target genes and 15 reference control genes in naïve CD4<sup>+</sup> T cells which were cultured for 4 h with either untreated or IFN $\gamma$ -treated keratinocytes. Before RNA isolation, T cells were isolated using flow cytometry. Total RNA was then extracted from  $1 \times 10^6$  naïve T cells using Direct-zol RNA Miniprep Kit (Zymo Research). All RNA samples were quantified by using Qubit RNA assay kit and RNA integrity was assessed using Agilent 2100 Bioanalyzer system.

25  $\mu$ g total RNA (5  $\mu$ L/sample) was mixed with nCounter<sup>®</sup> reporter CodeSet (3  $\mu$ L) and nCounter<sup>®</sup> capture ProbeSet (2  $\mu$ L) with hybridization buffer (5  $\mu$ L) for an overnight hybridization reaction at 65 °C. The reaction was cooled down to 4 °C, the

samples were purified and immobilised on a cartridge and data was assessed on the nCounter SPRINT Profiler. The exported data was analysed using NanoString nSolver 4.0.

### **Immunofluorescence Microscopy**

Keratinocytes, either untreated or incubated with 100 ng/mL IFN $\gamma$  overnight, were cultured on coverslips. These keratinocytes were loaded with SEB for 1 h at 37 °C, 5 % CO $_2$ , washed three times with serum-free KGM-2, before naïve T cells were added in serum-free medium (XVIVO-15, Lonza). After coincubation of these cells (time points are indicated in the figures), cells were fixed with 1,5 % PFA for 20 min, permeabilized with 0,1 % saponin (in PBS + 10 % FBS) and stained with DAPI (100 ng/mL), phalloidin-AF488 (0,4 U/mL), anti-phospho-L-plastin (1  $\mu$ g/mL) or anti-CD11a (LFA-1) (2  $\mu$ g/mL). Anti-rb-Cy3 (1  $\mu$ g/mL) was used as secondary antibody. Laser scanning confocal microscopy was performed using a Nikon A1R (40x objective; NA=1.3).

### **Flow cytometry**

Monoclonal antibodies recognizing the following surface markers and molecules were used for flow cytometry: CD2 (RPA-2.10), CD3 (SK7), CD4 (SK3), CD8 (SK1), CD25 (2A3), CD40 (5C3), CD45RA (HI30), CD69 (L78), CD54 (HA58), CD58 (TS2/9), CD80 (L307.4), CD86 (2331), CCR3 (5E8), CCR4 (L291H4), CCR5 (REA245), CCR6 (11A9), CCR7 (150503), CCR8 (L263G8), CCR9 (L053E8), CCR10 (6588-5), CXCR3 (G025H7), IL-2 (5344.111), IL-4 (301.211), IL-6 (MQ2-13A5), IL-17A (SCPL1362), IFN $\gamma$  (B27), TGF $\beta$  (TW4-9E7), HLA-DR (L243), HLA-ABC (W6/32), HLA-DQ (HLADQ1). 7AAD was used to discriminate dead cells. All antibodies were obtained from BD, eBioscience or BioLegend.

### **Intracellular staining for cytokines and transcription factors**

Cells which were already stained for surface markers, were fixed with 1,5 % PFA for 10 min at room temperature. Intracellular staining was performed in FACS buffer (PBS, 0,5 % albumin Fraction V, 0,1 % NaN<sub>3</sub>) containing 0,1 % saponin. Cells were washed with the same buffer and resuspended in PBS only for measurement.

For staining of transcription factors in differentiated T cells, surface markers were stained for 10 min on ice, before cells were fixed with True-Nuclear 1x Fix Concentration for 1 h at room temperature. T cells were permeabilized and stained for transcription factors (T-bet (4B10), GATA-3 (16E10A23) and ROR $\gamma$ t (Q21-559)) in True-Nuclear 1x Perm Buffer for 30 min at room temperature.

### **Phospho-flow cytometry**

For staining of phosphorylated proteins, surface markers were stained for 10 min on ice, before cells were fixed with Cytofix Fixation (BD Bioscience) buffer for 10 min at 37 °C, 5 % CO<sub>2</sub>. T cells were permeabilized with Phosphoflow Perm Buffer III for 30 min on ice, before cells were stained with phospho-specific antibodies (p<sub>Ser727</sub>STAT1 (A15158B), p<sub>Tyr705</sub>STAT3 (13A3-1), p<sub>Tyr693</sub>STAT4 (38/p-stat4), p<sub>Tyr705</sub>STAT5 (47/stat5), p<sub>Tyr641</sub>STAT6 (A15137E)).

### **Phenotyping keratinocytes**

Adherent keratinocytes, either untreated or incubated with 100 ng/mL IFN $\gamma$  overnight, were detached with warm trypsin/EDTA. The reaction was stopped by addition of RPMI1640 + 10 % FBS. Surface expression of HLA-DQ, HLA-DR, HLA-ABC and costimulatory receptors (CD40, CD54, CD58, CD80, CD86, and CD166) was analyzed by flow cytometry.
